# Supplementary material for: The tail-module of yeast Mediator complex is required for telomere heterochromatin maintenance
Source: PubMed Central journal article supplement — Nucleic Acids Res. 2011 Sep 19;40(2):581–93. doi: 10.1093/nar/gkr757 (PMC3258146; doi:10.1093/nar/gkr757), 2011-09-19
Supplement: supp_gkr757_nar-01241-v-2011-File003.pdf [file supp_gkr757_nar-01241-v-2011-File003.pdf]

**Supplementary Table S1. Yeast strains used in this work.**

| Strain | Genotype                                                                          | Source    |
|--------|-----------------------------------------------------------------------------------|-----------|
| BY4741 | MATa <i>his3Δ1 leu2Δ0 met15Δ0 ura3Δ0</i>                                          | Euroscarf |
| BY4742 | MATα <i>his3Δ1 leu2Δ0 lys2Δ0 ura3Δ0</i>                                           | Euroscarf |
| BY4743 | MATa/α <i>his3Δ1/his3Δ1 leu2Δ0/leu2Δ0 lys2Δ0/LYS2 MET15/met15Δ0 ura3Δ0/ura3Δ0</i> | Euroscarf |
| PJ-001 | BY4742 <i>med18Δ::KanMX4</i>                                                      | Euroscarf |
| PJ-002 | BY4742 <i>med19Δ::KanMX4</i>                                                      | Euroscarf |
| PJ-003 | BY4742 <i>med20Δ::KanMX4</i>                                                      | Euroscarf |
| PJ-004 | BY4742 <i>med1Δ::KanMX4</i>                                                       | Euroscarf |
| PJ-005 | BY4742 <i>med5Δ::KanMX4</i>                                                       | Euroscarf |
| PJ-006 | BY4742 <i>med9Δ::KanMX4</i>                                                       | Euroscarf |
| PJ-007 | BY4742 <i>med31Δ::KanMX4</i>                                                      | Euroscarf |
| PJ-008 | BY4742 <i>med2Δ::KanMX4</i>                                                       | Euroscarf |
| PJ-009 | BY4742 <i>med3Δ::KanMX4</i>                                                       | Euroscarf |
| PJ-010 | BY4742 <i>med15Δ::KanMX4</i>                                                      | Euroscarf |
| PJ-011 | BY4742 <i>med16Δ::KanMX4</i>                                                      | Euroscarf |
| PJ-012 | BY4742 <i>cdk8Δ::KanMX4</i>                                                       | Euroscarf |
| PJ-013 | BY4742 <i>cyccΔ::KanMX4</i>                                                       | Euroscarf |
| PJ-014 | BY4742 <i>med12Δ::KanMX4</i>                                                      | Euroscarf |
| PJ-015 | BY4742 <i>med13Δ::KanMX4</i>                                                      | Euroscarf |
| PJ-016 | BY4742 <i>med20Δ::KanMX4 med2Δ::HIS3</i>                                          | This work |
| PJ-017 | BY4742 <i>med16Δ::KanMX4 med2Δ::HIS3</i>                                          | This work |
| PJ-018 | BY4742 <i>cdk8Δ::KanMX4 med2Δ::HIS3</i>                                           | This work |
| PJ-019 | BY4742 <i>cdk8Δ::KanMX4 med20Δ::HIS3</i>                                          | This work |
| PJ-020 | BY4742 <i>UTΔU</i>                                                                | This work |
| PJ-021 | BY4742 <i>sir2Δ::HIS3 UTΔU</i>                                                    | This work |
| PJ-022 | BY4742 <i>med18Δ::KanMX4 UTΔU</i>                                                 | This work |
| PJ-023 | BY4742 <i>med20Δ::KanMX4 UTΔU</i>                                                 | This work |
| PJ-024 | BY4742 <i>med1Δ::KanMX4 UTΔU</i>                                                  | This work |
| PJ-025 | BY4742 <i>med5Δ::KanMX4 UTΔU</i>                                                  | This work |
| PJ-026 | BY4742 <i>med9Δ::KanMX4 UTΔU</i>                                                  | This work |
| PJ-027 | BY4742 <i>med31Δ::KanMX4 UTΔU</i>                                                 | This work |
| PJ-028 | BY4742 <i>med2Δ::KanMX4 UTΔU</i>                                                  | This work |
| PJ-029 | BY4742 <i>med3Δ::KanMX4 UTΔU</i>                                                  | This work |
| PJ-030 | BY4742 <i>med15Δ::KanMX4 UTΔU</i>                                                 | This work |
| PJ-031 | BY4742 <i>med16Δ::KanMX4 UTΔU</i>                                                 | This work |
| PJ-032 | BY4742 <i>cdk8Δ::KanMX4 UTΔU</i>                                                  | This work |
| PJ-033 | BY4742 <i>cyccΔ::KanMX4 UTΔU</i>                                                  | This work |
| PJ-034 | BY4742 <i>med12Δ::KanMX4 UTΔU</i>                                                 | This work |
| PJ-035 | BY4742 <i>med13Δ::KanMX4 UTΔU</i>                                                 | This work |
| PJ-036 | BY4743 <i>trk2Δ::URA3/TRK2</i>                                                    | This work |

|        |                                                                              |           |
|--------|------------------------------------------------------------------------------|-----------|
| PJ-037 | BY4743 <i>trk2Δ::URA3/TRK2 med20Δ::KanMX4/MED20</i>                          | This work |
| PJ-038 | BY4743 <i>trk2Δ::URA3/TRK2 med2Δ::KanMX4/MED2</i>                            | This work |
| PJ-039 | BY4743 <i>trk2Δ::URA3/TRK2 med15Δ::KanMX4/MED15</i>                          | This work |
| PJ-040 | BY4743 <i>trk2Δ::URA3/TRK2 cdk8Δ::KanMX4/CDK8</i>                            | This work |
| PJ-041 | BY4742 <i>sir2Δ::HIS3 med5Δ::KanMX4 UTAU</i>                                 | This work |
| PJ-042 | BY4742 <i>sir2Δ::HIS3 med2Δ::KanMX4 UTAU</i>                                 | This work |
| PJ-043 | BY4742 <i>sir2Δ::HIS3 med15Δ::KanMX4 UTAU</i>                                | This work |
| PJ-044 | BY4742 <i>sir2Δ::HIS3 cdk8Δ::KanMX4 UTAU</i>                                 | This work |
| PJ-045 | BY4742 <i>sir2Δ::LEU2 med3Δ::KanMX4 UTAU</i>                                 | This work |
| PJ-046 | BY4742 <i>sir2Δ::LEU2 med20Δ::KanMX4 UTAU</i>                                | This work |
| PJ-047 | BY4742 <i>hht1-hhf1Δ::hisG hht2-hhf2Δ::hisG<br/>HHT1-HHF1::LEU2 UTAU</i>     | This work |
| PJ-048 | BY4742 <i>hht1-hhf1Δ::hisG hht2-hhf2Δ::hisG<br/>HHT1-hhf1K16R::LEU2 UTAU</i> | This work |
| PJ-049 | BY4742 <i>SIR2-13MYC::HIS3 UTAU</i>                                          | This work |
| PJ-050 | BY4742 <i>med20Δ::KanMX4 SIR2-13MYC::HIS3 UTAU</i>                           | This work |
| PJ-051 | BY4742 <i>med2Δ::KanMX4 SIR2-13MYC::HIS3 UTAU</i>                            | This work |
| PJ-052 | BY4743 <i>SIR2-13MYC::HIS3/SIR2 med3Δ::KanMX4/MED3<br/>UTAU/WT</i>           | This work |
| PJ-053 | BY4743 <i>SIR2-13MYC::HIS3/SIR2 med15Δ::KanMX4/MED15<br/>UTAU/WT</i>         | This work |
| PJ-054 | BY4743 <i>SIR2-13MYC::HIS3/SIR2 med16Δ::KanMX4/MED16<br/>UTAU/WT</i>         | This work |
| PJ-055 | BY4742 <i>SIR3-13MYC::HIS3 UTAU</i>                                          | This work |
| PJ-056 | BY4742 <i>med2Δ::KanMX4 SIR3-13MYC::HIS3 UTAU</i>                            | This work |
| PJ-057 | BY4742 <i>med3Δ::KanMX4 SIR3-13MYC::HIS3 UTAU</i>                            | This work |
| PJ-058 | BY4742 <i>med15Δ::KanMX4 SIR3-13MYC::HIS3 UTAU</i>                           | This work |
| PJ-059 | BY4742 <i>med16Δ::KanMX4 SIR3-13MYC::HIS3 UTAU</i>                           | This work |
| PJ-060 | BY4742 <i>med20Δ::KanMX4 SIR3-13MYC::HIS3 UTAU</i>                           | This work |
| PJ-061 | BY4742 <i>SIR4-13MYC::HIS3 UTAU</i>                                          | This work |
| PJ-062 | BY4742 <i>med2Δ::KanMX4 SIR4-13MYC::HIS3 UTAU</i>                            | This work |
| PJ-063 | BY4742 <i>med3Δ::KanMX4 SIR4-13MYC::HIS3 UTAU</i>                            | This work |
| PJ-064 | BY4742 <i>med15Δ::KanMX4 SIR4-13MYC::HIS3 UTAU</i>                           | This work |
| PJ-065 | BY4742 <i>med16Δ::KanMX4 SIR4-13MYC::HIS3 UTAU</i>                           | This work |
| PJ-066 | BY4742 <i>med20Δ::KanMX4 SIR4-13MYC::HIS3 UTAU</i>                           | This work |
| PJ-067 | BY4742 <i>SIR2-13MYC::HIS3</i>                                               | This work |
| PJ-068 | BY4742 <i>med2Δ::KanMX4 SIR2-13MYC::HIS3</i>                                 | This work |
| PJ-069 | BY4742 <i>med3Δ::KanMX4 SIR2-13MYC::HIS3</i>                                 | This work |
| PJ-070 | BY4742 <i>med15Δ::KanMX4 SIR2-13MYC::HIS3</i>                                | This work |
| PJ-071 | BY4742 <i>med16Δ::KanMX4 SIR2-13MYC::HIS3</i>                                | This work |
| PJ-072 | BY4742 <i>med20Δ::KanMX4 SIR2-13MYC::HIS3</i>                                | This work |
| PJ-073 | BY4742 <i>MED20-13MYC::HIS3 UTAU</i>                                         | This work |
| PJ-074 | BY4742 <i>MED2-13MYC::HIS3 UTAU</i>                                          | This work |

|        |                                                       |           |
|--------|-------------------------------------------------------|-----------|
| PJ-075 | BY4742 <i>MED3-13MYC::HIS3 UTAU</i>                   | This work |
| PJ-076 | BY4742 <i>MED5-13MYC::HIS3 UTAU</i>                   | This work |
| PJ-077 | BY4742 <i>CYCC-13MYC::HIS3 UTAU</i>                   | This work |
| PJ-078 | BY4742 <i>MED20-13MYC::HIS3 sir2Δ::LEU2 UTAU</i>      | This work |
| PJ-079 | BY4742 <i>MED2-13MYC::HIS3 sir2Δ::LEU2 UTAU</i>       | This work |
| PJ-080 | BY4742 <i>MED3-13MYC::HIS3 sir2Δ::LEU2 UTAU</i>       | This work |
| PJ-081 | BY4742 <i>MED5-13MYC::HIS3 sir2Δ::LEU2 UTAU</i>       | This work |
| PJ-082 | BY4742 <i>CYCC-13MYC::HIS3 sir2Δ::LEU2 UTAU</i>       | This work |
| PJ-083 | BY4743 <i>rap1ΔRAP1 UTAU/WT</i>                       | This work |
| PJ-084 | BY4743 <i>rap1ΔRAP1 MED2-13MYC::HIS3/MED2 UTAU/WT</i> | This work |
| PJ-085 | BY4743 <i>rap1ΔRAP1 MED3-13MYC::HIS3/MED3 UTAU/WT</i> | This work |
| PJ-086 | BY4742 <i>MED2-13MYC::HIS3 med20Δ::LEU2 UTAU</i>      | This work |
| PJ-087 | BY4742 <i>MED2-13MYC::HIS3 med15Δ::LEU2 UTAU</i>      | This work |
| PJ-088 | BY4742 <i>MED3-13MYC::HIS3 med20Δ::LEU2 UTAU</i>      | This work |
| PJ-089 | BY4742 <i>MED3-13MYC::HIS3 med15Δ::LEU2 UTAU</i>      | This work |
| PJ-090 | BY4742 <i>MED5-13MYC::HIS3 med20Δ::LEU2 UTAU</i>      | This work |
| PJ-091 | BY4742 <i>MED5-13MYC::HIS3 med15Δ::LEU2 UTAU</i>      | This work |

### Supplementary Figure S1

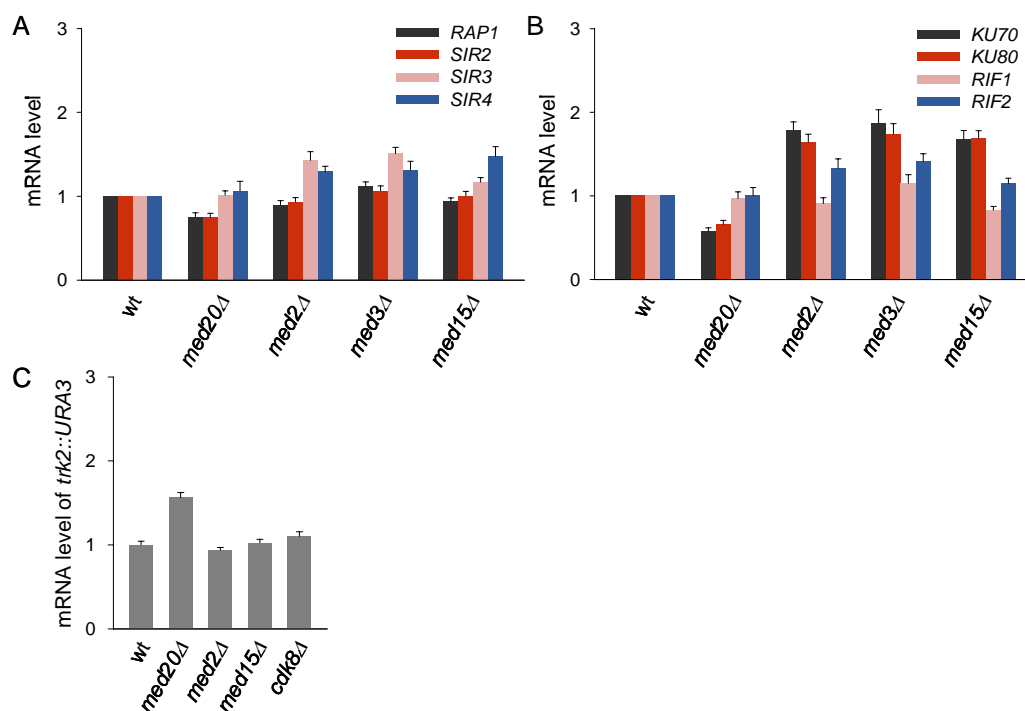

**Supplementary Figure S1.** Mediator doesn't affect transcription of heterochromatin-related genes or *URA3* gene integrated at the euchromatic *TRK2* locus. (A) and (B) Expression of heterochromatin components and related genes in Mediator mutants was examined by qRT-PCR. Statistical analyses were calculated using Student's *t*-test (\* $P < 0.05$  and \*\* $P < 0.01$ ). (C) Expression of *trk2::URA3* gene in Mediator mutants.

### Supplementary Figure S2

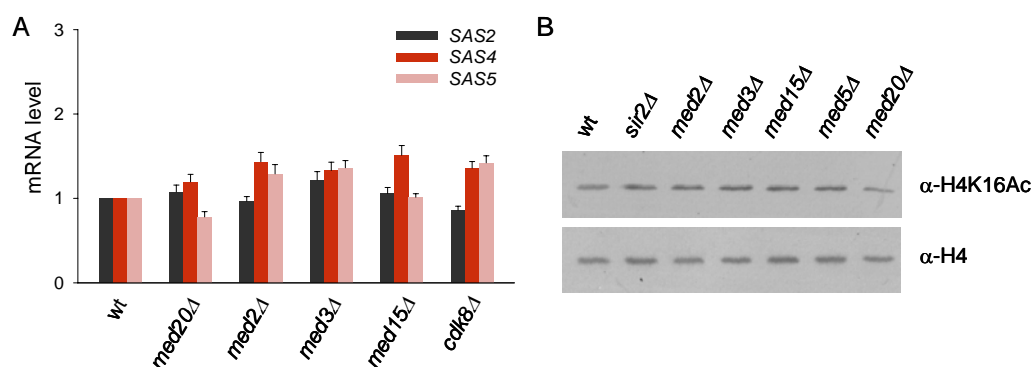

**Supplementary Figure S2.** Deletion of Mediator has little effect on expression of SAS-I components or the global acetylation of H4K16. (A) Expression of genes encoding SAS-I complex was detected by qRT-PCR. Statistical analyses were calculated using Student's *t*-test (\* $P < 0.05$  and \*\* $P < 0.01$ ). (B) The global acetylation of H4K16 in Mediator mutants was examined by Western blot.

### Supplementary Figure S3

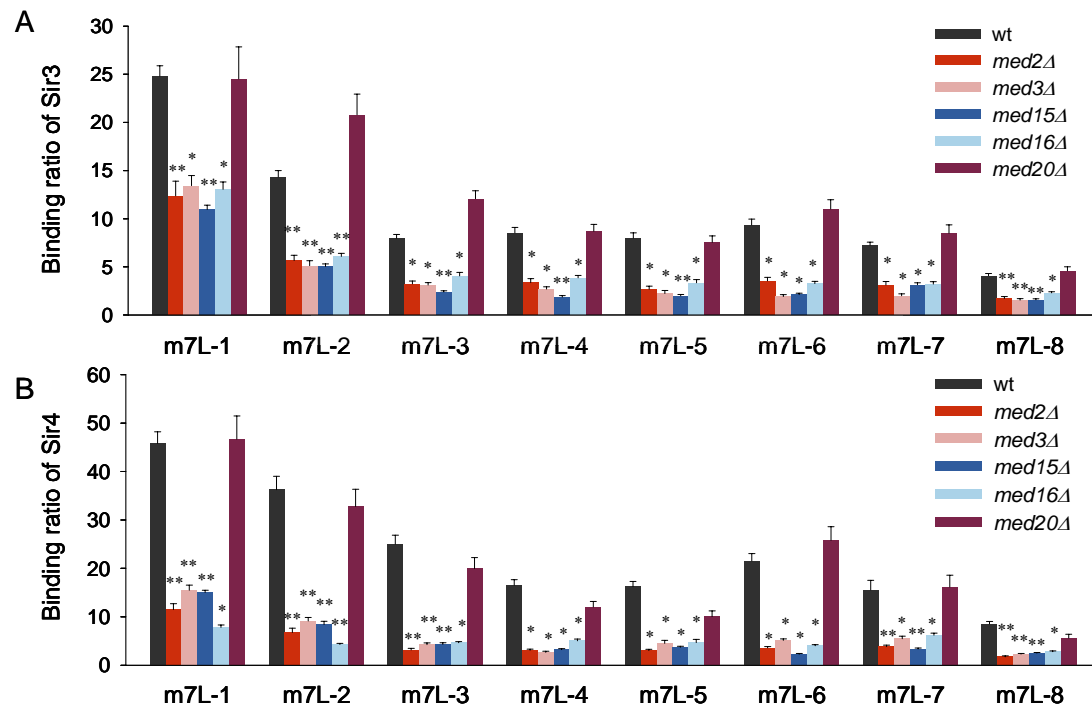

**Supplementary Figure S3.** Sir3 and Sir4 binding on modified telomere VIII L is significantly reduced in Mediator tail mutants. Binding of 13Myc-tagged Sir3 (A) or Sir4 (B) on m7L was detected by ChIP assay using anti-Myc antibody. Statistical analyses were calculated using Student's *t*-test (\* $P < 0.05$  and \*\* $P < 0.01$ ).
